# Supplementary material for: Novel Combination of COX-2 Inhibitor and Antioxidant Therapy for Modulating Oxidative Stress Associated with Intestinal Ischemic Reperfusion Injury and Endotoxemia
Source: PubMed Central journal article supplement (PMC7601577; doi:10.3390/antiox9100930), 2020-09-28

**Figure S1.** Effect of combined therapy of Firocoxib and Vitamin C on sham animals: Mean arterial blood pressure (A), Survival % (B), Western Blot analysis of COX-2 (C), Densitometric analysis (C'), total glutathione (GSH)(D), superoxide dismutase (SOD) (E), catalase (CAT) (F).

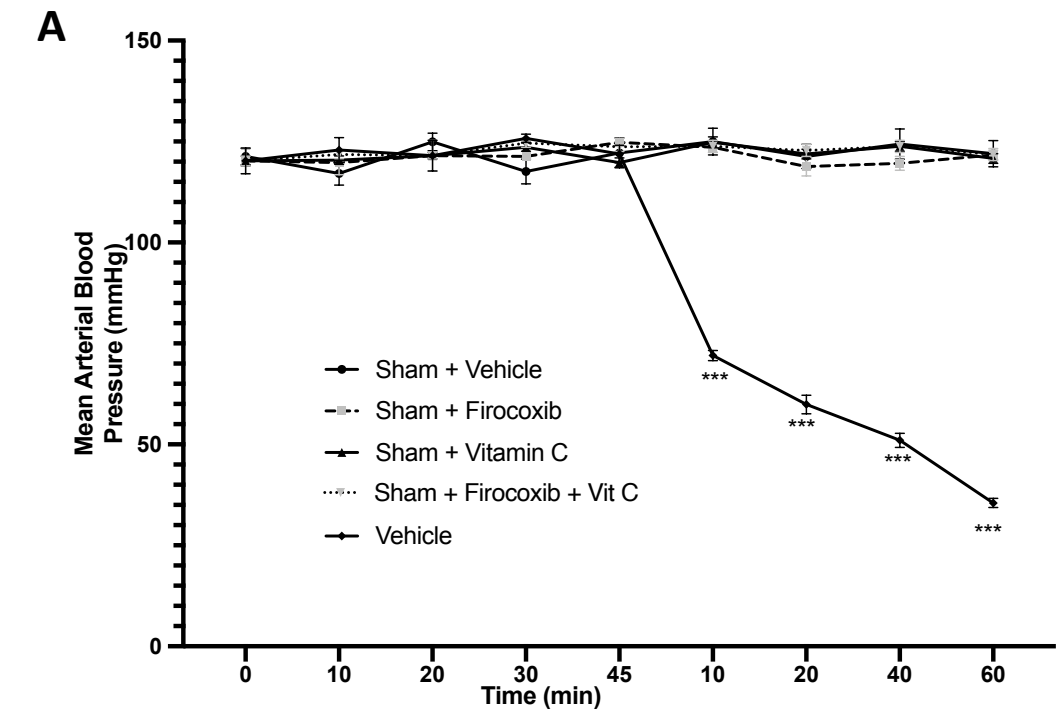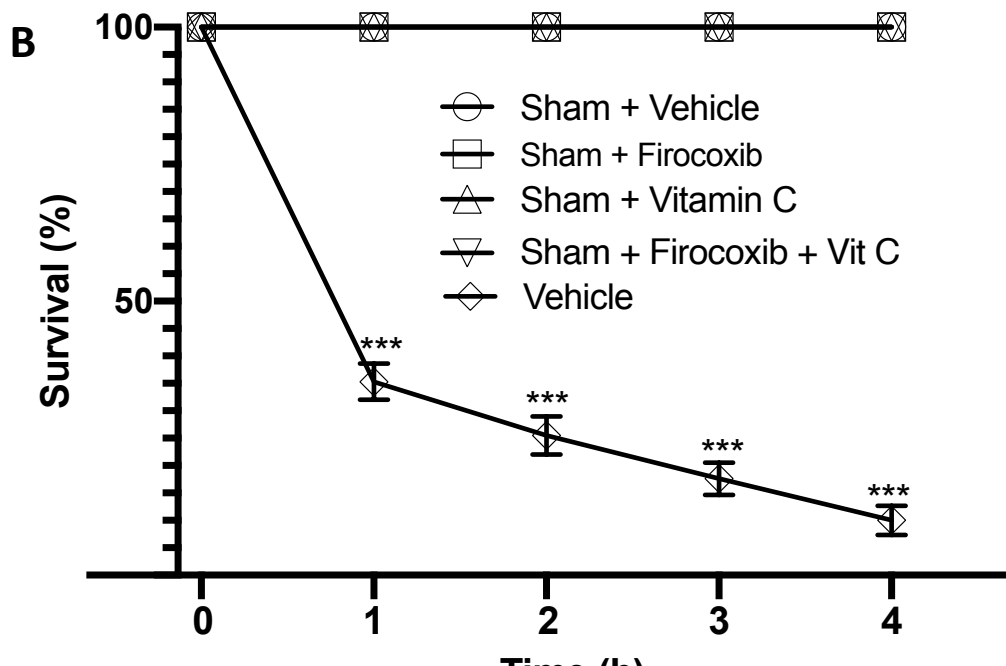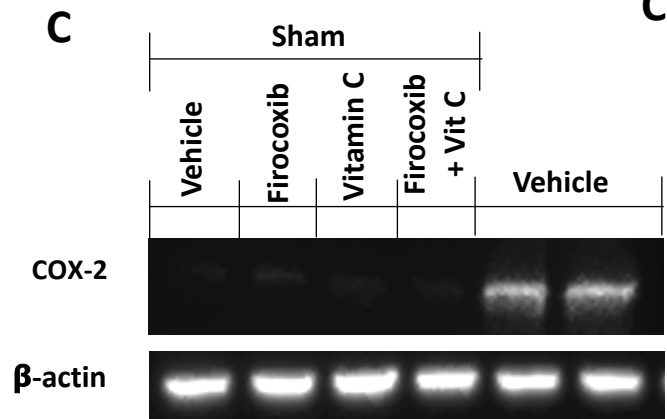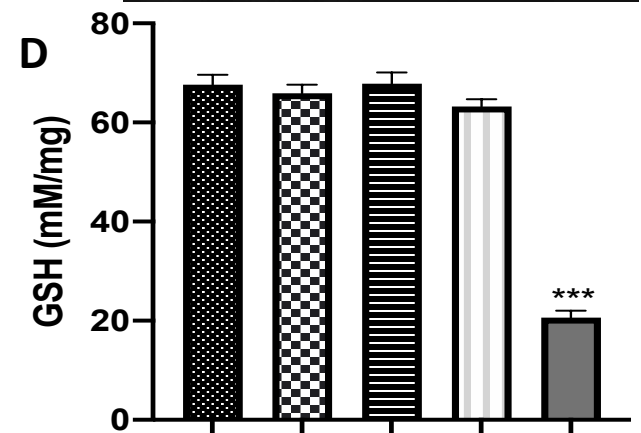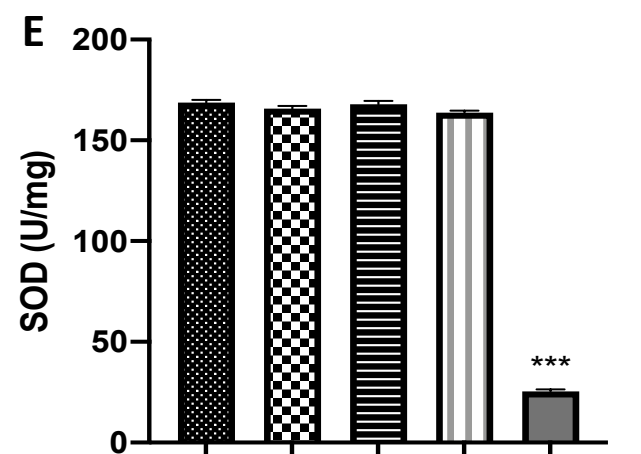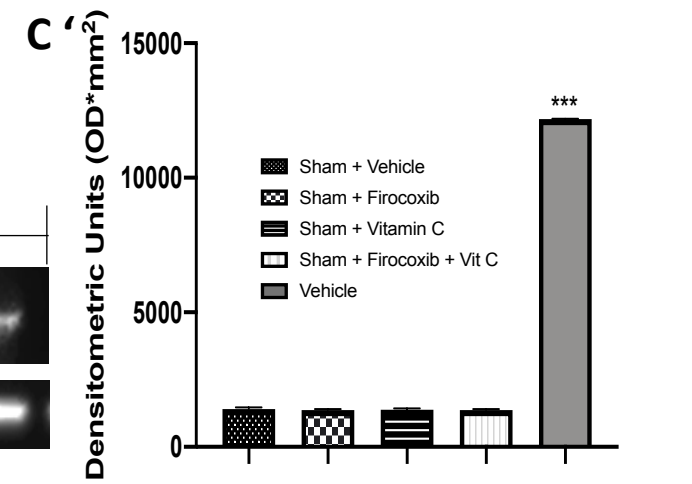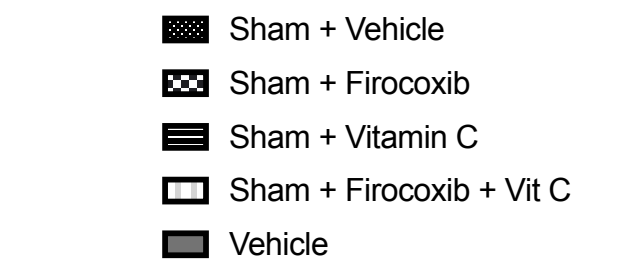

Supplement: antioxidants-09-00930-s001.pdf [file antioxidants-09-00930-s001.pdf]
